# Supplementary material for: The Glu143 Residue Might Play a Significant Role in T20 Peptide Binding to HIV-1 Receptor gp41: An In Silico Study
Source: MDPI journal article supplement (doi:10.3390/molecules27123936), 2022-06-20
Supplement: s1 [file s1]

# The Glu143 residue might play a significant role in T20 peptide binding to HIV-1 receptor gp41: An In silico study

Ahmed L. Alaofi <sup>1\*</sup>

Department of Pharmaceutics, College of Pharmacy, King Saud University, P.O. Box 2457, Riyadh 11451; ahmedofi@ksu.edu.sa

\* Correspondence: ahmedofi@ksu.edu.sa

Table S1: Ranking of docking models using MM-GBSA scoring.

| Ranking | WT T20        | Binding free energy of complex (kcal/mol) |
|---------|---------------|-------------------------------------------|
| 2       | T20WT_model2  | -42.13                                    |
| 4       | T20WT_model4  | -30.19                                    |
| 9       | T20WT_model9  | -28.83                                    |
| 3       | T20WT_model3  | -28.39                                    |
| 5       | T20WT_model5  | -27.13                                    |
| 8       | T20WT_model8  | -27.07                                    |
| 10      | T20WT_model10 | -26.94                                    |
| 7       | T20WT_model7  | -20.36                                    |
| 1       | T20WT_model1  | -14.43                                    |
| 6       | T20WT_model6  | -12.01                                    |

| Ranking | E143A mutant   | Binding free energy of complex (kcal/mol) |
|---------|----------------|-------------------------------------------|
| 1       | T20_mu_model1  | -61.78                                    |
| 9       | T20_mu_model9: | -55.38                                    |
| 6       | T20_mu_model6  | -43.45                                    |
| 5       | T20_mu_model5  | -42.82                                    |
| 2       | T20_mu_model2: | -34.49                                    |
| 8       | T20_mu_model8  | -34.08                                    |
| 10      | T20_mu_model10 | -17.29                                    |
| 4       | T20_mu_model4  | -12.62                                    |
| 3       | T20_mu_model3  | -11.88                                    |
| 7       | T20_mu_model7  | -11.04                                    |
